# Supplementary material for: Empirical Models to Characterize the Structural and Physiochemical Properties of Vacuum Gas Oils with Different Saturate Contents
Source: MDPI journal article supplement (doi:10.3390/resources10070071), 2021-07-09
Supplement: s1 [file s1]

## *Supplementary material*

### **Empirical Models to Characterize the structural and physio-chemical properties of Vacuum Gas Oils with different saturate contents**

Dicho S. Stratiev<sup>1</sup>, Ivelina K. Shishkova<sup>1</sup>, Rosen K. Dinkov<sup>1</sup>, Ivan P. Petrov<sup>1</sup>, Iliyan V. Kolev<sup>1</sup>, Dobromir Yordanov<sup>2</sup>, Sotir Sotirov<sup>2</sup>, Evdokia Sotirova<sup>2</sup>, Vassia Atanassova<sup>3</sup>, Simeon Ribagin<sup>3</sup>, Krasimir Atanassov<sup>2,3</sup>, Danail D. Stratiev<sup>3</sup>, Svetoslav Nenov<sup>4</sup>, Liliana Yankova<sup>2</sup>, Kamen Zlatanov<sup>4</sup>

<sup>1</sup> LUKOIL Neftohim Burgas, 8104 Burgas, Bulgaria

[Stratiev.Dicho@neftochim.bg](mailto:Stratiev.Dicho@neftochim.bg); [Shishkova.Ivelina.K@neftochim.bg](mailto:Shishkova.Ivelina.K@neftochim.bg);

[Dinkov.Rosen.K@neftochim.bg](mailto:Dinkov.Rosen.K@neftochim.bg); [Petrov.Ivan.P@neftochim.bg](mailto:Petrov.Ivan.P@neftochim.bg); [Kolev.Iliyan.V@neftochim.bg](mailto:Kolev.Iliyan.V@neftochim.bg);

<sup>2</sup> University Prof. Dr. Assen Zlatarov, Professor Yakimov 1, 8010 Burgas, Bulgaria

[dobromirj@abv.bg](mailto:dobromirj@abv.bg); [ssotirov@btu.bg](mailto:ssotirov@btu.bg); [esotirova@btu.bg](mailto:esotirova@btu.bg); [k.t.atanassov@gmail.com](mailto:k.t.atanassov@gmail.com);

[litoian@abv.bg](mailto:litoian@abv.bg)

<sup>3</sup> Institute of Biophysics and Biomedical Engineering, Bulgarian Academy of Sciences,

Bulgarian Academy of Sciences, Academic Georgi Bonchev 105, 1113 Sofia, Bulgaria

[vassia.atanassova@gmail.com](mailto:vassia.atanassova@gmail.com); [sim\\_ribagin@mail.bg](mailto:sim_ribagin@mail.bg); [k.t.atanassov@gmail.com](mailto:k.t.atanassov@gmail.com);

[danail.stratiev@gmail.com](mailto:danail.stratiev@gmail.com)

<sup>4</sup> University of Chemical Technology and Metallurgy, Kliment Ohridski 8, 1756 Sofia,

Bulgaria

[s.nenov@gmail.com](mailto:s.nenov@gmail.com); [kamenzlatanov99@gmail.com](mailto:kamenzlatanov99@gmail.com)

*\*Corresponding author: D. Stratiev, e-mail: stratiev.dicho@neftochim.bg;*

Table S1 Properties of the vacuum gas oils under study

| feed number | feed name     | Density at 15°C (g/ml) | Kw   | MW  | Kin. viscosity at 100°C | T <sub>50%</sub> , °C | CCR, wt. % | Hydrogen content (wt.%) | H/C atomic ratio | Total Nitrogen Content (wppm) | Basic Nitrogen Content (wppm) | Sulphur % |
|-------------|---------------|------------------------|------|-----|-------------------------|-----------------------|------------|-------------------------|------------------|-------------------------------|-------------------------------|-----------|
| 1           | HCB [2]       | 0.8643                 | 12.6 | 396 | 6.5                     | 450                   |            | 13.7                    | 1.9              | 0.0                           | 0.5                           | 0.001     |
| 2           | HT--VIR [2]   | 0.9252                 | 12.2 | 490 | 20.1                    | 520                   |            | 12.3                    | 1.7              | 460.0                         | 51.0                          | 0.098     |
| 3           | RZ [2]        | 0.8988                 |      | 366 |                         |                       |            | 12.8                    | 1.8              | 800.0                         | 240.0                         | 0.917     |
| 4           | HT-LCF [2]    | 0.9284                 | 11.9 | 424 | 13.6                    | 485                   |            | 12.1                    | 1.6              | 1090.0                        | 148.0                         | 0.088     |
| 5           | HT-C [2]      | 0.9511                 | 11.8 | 467 | 22.8                    | 515                   |            | 11.5                    | 1.6              | 2150.0                        | 439.0                         | 0.429     |
| 6           | HT-DA [2]     | 0.9430                 |      | 600 |                         |                       |            | 11.8                    | 1.6              | 2450.0                        | 613.0                         | 0.704     |
| 7           | VIR [2]       | 0.9712                 | 11.8 | 588 | 66.3                    | 575                   |            | 11.1                    | 1.5              | 1930.0                        | 610.0                         | 3.250     |
| 8           | LCF [2]       | 0.9562                 | 11.5 | 376 | 12.0                    | 462                   |            | 11.2                    | 1.5              | 3370.0                        | 991.0                         | 1.350     |
| 9           | DA-LCF [2]    | 0.9642                 | 11.7 | 470 | 27.0                    | 520                   |            | 11.2                    | 1.5              | 4020.0                        | 1212.0                        | 1.520     |
| 10          | DA-BIT [2]    | 0.9776                 | 12.0 | 715 | 161.7                   | 620                   |            | 11.1                    | 1.6              | 3050.0                        | 815.0                         | 3.540     |
| 11          | BG LIGHT [3]  | 0.8640                 | 12.2 | 295 | 2.6                     | 376                   | 0.1        | 13.4                    |                  | 367.0                         | 103.0                         | 0.5       |
| 12          | PEMBINA [3]   | 0.8932                 | 12.1 | 351 | 5.0                     | 428                   | 0.1        | 12.8                    |                  | 575.0                         | 154.0                         | 0.2       |
| 13          | EKOFISK [3]   | 0.9019                 | 12.1 | 371 | 5.0                     | 444                   | 0.0        | 12.6                    |                  | 790.0                         | 325.0                         | 0.3       |
| 14          | BRENT [3]     | 0.8937                 | 12.0 | 322 | 5.3                     | 406                   | 0.3        | 12.7                    |                  | 938.0                         | 413.0                         | 0.5       |
| 15          | BOW RIVER [3] | 0.9315                 | 11.6 | 328 | 5.9                     | 421                   | 0.1        | 11.8                    |                  | 989.0                         | 253.0                         | 2.7       |
| 16          | COLD LAKE [3] | 0.9283                 | 11.6 | 321 | 5.1                     | 415                   | 0.1        | 11.8                    |                  | 748.0                         | 241.0                         | 2.0       |
| 17          | CANMENT [3]   | 0.9438                 | 11.1 | 263 | 3.6                     | 369                   | 0.4        | 11.3                    |                  | 4122.0                        | 1543.0                        | 2.9       |
| 18          | VISBROKEN [3] | 0.9688                 | 10.9 | 276 | 3.4                     | 388                   | 0.1        | 10.7                    |                  | 1537.0                        | 346.0                         | 1.9       |
| 19          | COKER [3]     | 1.0077                 | 10.7 | 313 | 11.4                    | 429                   | 2.2        | 9.8                     |                  | 2910.0                        | 1144.0                        | 4.6       |
| 20          | VGO [4]       | 0.9110                 | 11.9 | 345 | 5.3                     | 428                   |            |                         | 1.686            | 595.0                         |                               | 3.0       |
| 21          | HVDI [4]      | 0.8950                 | 12.1 | 410 | 5.8                     | 433                   |            |                         | 1.76             | 515.0                         |                               | 1.0       |

|    |                        |        |      |     |     |     |       |       |        |       |
|----|------------------------|--------|------|-----|-----|-----|-------|-------|--------|-------|
| 22 | HVD2 [4]               | 0.8650 | 12.5 | 391 | 5.4 | 429 |       | 1.83  | 15.0   | 0.1   |
| 23 | HVD3 [4]               | 0.8690 | 12.3 | 348 | 4.1 | 410 |       | 1.757 | 5.0    | 0.0   |
| 24 | H-Oil VGO [32]         | 0.9355 | 11.7 | 366 |     | 450 |       |       |        |       |
| 25 | 5%FCC SLO [32]         | 0.9455 | 11.5 | 362 |     | 450 |       |       |        |       |
| 26 | 10% FCC SLO [32]       | 0.9555 | 11.4 | 358 |     | 450 |       |       |        |       |
| 27 | 15% FCC SLO [32]       | 0.9655 | 11.2 | 355 |     | 450 |       |       |        |       |
| 28 | SCO-HGO [33]           | 0.9423 | 11.4 | 313 |     | 412 |       |       | 1501.0 | 240.0 |
| 29 | HTC-HGO [33]           | 0.9324 | 11.5 | 321 |     | 416 |       |       | 342.0  | 16.0  |
| 30 | CON-HGO [33]           | 0.9111 | 11.9 | 346 |     | 429 |       |       | 1225.0 | 232.0 |
| 31 | HSVGO [34]             |        |      |     |     |     |       |       |        | 0.929 |
| 32 | Mixed feed [34]        |        |      |     |     |     |       |       |        |       |
| 33 | OHCU bottom [34]       |        |      |     |     |     |       |       |        |       |
| 34 | HVGO [34]              |        |      |     |     |     |       |       |        |       |
| 35 | Brass River [35]       |        |      |     |     |     | 12.72 | 1.75  |        |       |
| 36 | Lagomedio [35]         |        |      |     |     |     | 12.55 | 1.759 |        |       |
| 37 | Maya [35]              |        |      |     |     |     | 11.87 | 1.68  |        |       |
| 38 | Wilmington [35]        |        |      |     |     |     | 11.23 | 1.56  |        |       |
| 39 | Merey [35]             |        |      |     |     |     | 11.94 | 1.69  |        |       |
| 40 | DQ-VGO [36]            | 0.8010 | 13.5 | 426 |     | 427 | 0.1   | 15.59 | 2.23   |       |
| 41 | DG-CGO [36]            | 0.9100 | 11.7 | 308 |     | 393 | 0.1   | 11.69 | 1.63   |       |
| 42 | FCC SLO(CLO-1)<br>[37] |        |      | 259 |     |     |       | 6.91  |        |       |
| 43 | FCC SLO(CLO-2)<br>[37] |        |      | 300 |     |     |       | 6.88  |        |       |
| 44 | FCC SLO(CLO-3)<br>[37] |        |      | 266 |     |     |       | 7.51  |        |       |
| 45 | FCC SLO(CLO-4)<br>[37] |        |      | 258 |     |     |       | 7.58  |        |       |

|    |                        |        |     |      |      |       |      |
|----|------------------------|--------|-----|------|------|-------|------|
| 46 | FCC SLO(CLO-5)<br>[37] |        | 287 |      |      | 9.18  |      |
| 47 | FCC SLO(CLO-6)<br>[37] |        | 307 |      |      | 9.22  |      |
| 48 | FCC SLO(CLO-7)<br>[37] |        | 343 |      |      | 9.08  |      |
| 49 | FCC SLO(CLO-8)<br>[37] |        | 377 |      |      | 9.96  |      |
| 50 | FCC SLO(CLO-9)<br>[37] |        | 353 |      |      | 9.82  |      |
| 51 | FCC SLO(CLO-10) [37]   |        | 337 |      |      | 10.2  |      |
| 52 | FCC SLO(CLO-11) [37]   |        | 345 |      |      | 10.17 |      |
| 53 | FCC SLO(CLO-12) [37]   |        | 346 |      |      | 9.98  |      |
| 54 | FCC SLO(CLO-13) [37]   |        | 365 |      |      | 10.55 |      |
| 55 | FCC SLO(CLO-14) [37]   |        | 446 |      |      | 11.37 |      |
| 56 | FCC SLO(CLO-15) [37]   |        | 437 |      |      | 11.7  |      |
| 57 | FCC SLO [38]           | 1.0116 | 352 | 22.5 | 11   | 9.45  | 1.28 |
| 58 | FCC SLO -A1 [39]       | 1.038  |     |      | 5.54 | 9.05  | 1.21 |
| 59 | FCC SLO -A2 [39]       | 1.005  |     |      | 4.45 | 9.81  | 1.32 |
| 60 | FCC SLO -B [39]        | 1.065  |     |      |      | 7.8   | 1.03 |
| 61 | FCC SLO -C [39]        | 1.0372 |     |      | 4.12 | 8.37  | 1.12 |
| 62 | FCC SLO -D [39]        | 0.9881 |     |      | 4.03 | 9.93  | 1.34 |
| 63 | FCC SLO -E [39]        | 0.9621 |     |      | 2.5  | 10.43 | 1.40 |
| 64 | FCC SLO -F [39]        | 0.9954 |     |      | 1.66 | 9.38  | 1.25 |
| 65 | FCC SLO -G [39]        | 0.993  |     |      | 2.83 | 9.5   | 1.27 |
| 66 | LSVR [39]              | 0.928  |     |      | 10.2 | 12.5  |      |
| 67 | Bitumen GV-1 [15]      | 0.9336 |     |      |      | 11.9  | 1.62 |

|    |                   |        |      |     |     |      |      |
|----|-------------------|--------|------|-----|-----|------|------|
| 68 | Bitumen GV-2 [15] | 0.9429 |      |     |     | 11   | 1.51 |
| 69 | Bitumen GV-3 [15] | 0.948  |      |     |     | 11.3 | 1.56 |
| 70 | Bitumen GV-4 [15] | 0.9489 |      |     |     | 11   | 1.51 |
| 71 | Bitumen GV-5 [15] | 0.9545 |      |     |     | 11   | 1.53 |
| 72 | Bitumen GV-6 [15] | 0.9755 |      |     |     | 10.7 | 1.51 |
| 73 | VGO [34]          | 0.8386 | 12.6 | 309 | 380 | 14.4 |      |
| 74 | VGO [34]          | 0.996  | 11.1 | 389 | 481 | 9.9  |      |

| feed<br>number | feed name     | Aromatic<br>Carbon<br>Content,<br>wt.% | Aniline<br>Point,<br>°C | Refractive<br>Index at<br>20°C | Saturates | Paraffins | Cyclo-<br>paraffins | Aro<br>matic<br>s | mono-ARO | di-ARO |
|----------------|---------------|----------------------------------------|-------------------------|--------------------------------|-----------|-----------|---------------------|-------------------|----------|--------|
| 1              | HCB [2]       | 4.4                                    | 99.8                    | 1.4747                         | 90.1      | 21.7      | 68.4                | 9.3               | 6.9      | 1.2    |
| 2              | HT--VIR [2]   | 17.6                                   | 74.2                    | 1.5130                         | 46.8      | 4.1       | 42.7                | 52.3              | 29.1     | 10.5   |
| 3              | RZ [2]        | 14.6                                   | 89.4                    | 1.4967                         | 61.0      | 22.8      | 38.2                | 36.1              | 16.6     | 7.7    |
| 4              | HT-LCF [2]    | 20.2                                   | 71.8                    | 1.5153                         | 45.7      | 7.4       | 38.3                | 52.3              | 27.6     | 11.9   |
| 5              | HT-C [2]      | 24.7                                   | 63.6                    | 1.5323                         | 34.4      | 4.7       | 29.7                | 61.8              | 29.5     | 13.6   |
| 6              | HT-DA [2]     | 20.9                                   | 81.0                    | 1.5269                         | 35.4      | 5.0       | 30.4                | 57.5              | 29.5     | 12.7   |
| 7              | VIR [2]       | 25.4                                   | 50.8                    | 1.5397                         | 28.7      | 1.8       | 26.9                | 65.6              | 22.5     | 14.4   |
| 8              | LCF [2]       | 30.1                                   | 58.0                    | 1.5324                         | 35.5      | 5.2       | 30.3                | 58.4              | 20.6     | 13.6   |
| 9              | DA-LCF [2]    | 28.8                                   | 65.8                    | 1.5370                         | 29.1      | 4.3       | 24.8                | 59.1              | 26.3     | 13.1   |
| 10             | DA-BIT [2]    | 24.4                                   | 62.8                    | 1.5393                         | 23.0      | 1.4       | 21.6                | 61.8              | 24.7     | 14.0   |
| 11             | BG LIGHT [3]  | 9.9                                    | 87.8                    | 1.4786                         | 73.7      | 35.2      | 38.5                | 27.5              | 11.3     | 7.1    |
| 12             | PEMBINA [3]   | 14.4                                   | 92.7                    | 1.4936                         | 71.7      | 30.2      | 41.5                | 30.5              | 10.8     | 8.4    |
| 13             | EKOFISK [3]   | 15.7                                   | 87.2                    | 1.5013                         | 61.9      | 28.3      | 33.6                | 42.0              | 15.1     | 10.6   |
| 14             | BRENT [3]     | 16.3                                   | 86.2                    | 1.4990                         | 62.9      | 24.6      | 38.3                | 40.1              | 12.9     | 10.2   |
| 15             | BOW RIVER [3] | 26.2                                   | 66.7                    | 1.5171                         | 48.2      | 15.2      | 33                  | 54.8              | 17.6     | 14.0   |
| 16             | COLD LAKE [3] | 25.7                                   | 70.0                    | 1.5154                         | 50.0      | 16.1      | 33.9                | 52.2              | 15.4     | 14.6   |
| 17             | CANMENT [3]   | 33.8                                   | 58.5                    | 1.5297                         | 47.4      | 19.5      | 27.9                | 58.8              | 14.5     | 16.0   |
| 18             | VISBROKEN [3] | 39.6                                   | 50.5                    | 1.5588                         | 40.3      | 16.4      | 23.9                | 62.6              | 9.6      | 16.6   |
| 19             | COKER [3]     | 47.8                                   | 33.1                    | 1.5695                         | 25.3      | 2.4       | 22.9                | 84.0              | 17.1     | 19.6   |
| 20             | VGO [4]       |                                        | 75.1                    |                                | 46.4      |           |                     | 49.0              | 25.4     | 12.5   |
| 21             | HVDI [4]      |                                        | 84.7                    |                                | 53.2      |           |                     | 43.6              | 31.3     | 7.4    |

|    |                     |    |      |      |      |       |      |      |      |
|----|---------------------|----|------|------|------|-------|------|------|------|
| 22 | HVD2 [4]            |    | 97.6 | 70.6 |      |       | 27.7 | 23.4 | 0.8  |
| 23 | HVD3 [4]            |    | 91.3 | 65.2 |      |       | 33.1 | 17.0 | 12.1 |
| 24 | H-Oil VGO [32]      |    |      | 47.7 |      |       | 44.2 | 13.7 | 10.4 |
| 25 | 5%FCC SLO [32]      |    |      | 46.5 |      |       | 45.9 | 12.5 | 9.8  |
| 26 | 10% FCC SLO [32]    |    |      | 44.0 |      |       | 49.2 | 11.3 | 9.9  |
| 27 | 15% FCC SLO [32]    |    |      | 42.5 |      |       | 51.5 | 11.2 | 9.6  |
| 28 | SCO-HGO [33]        | 27 | 65.4 | 44.9 | 6.0  | 38.84 | 55.1 | 23.7 | 15.4 |
| 29 | HTC-HGO [33]        | 24 | 71.8 | 50.7 | 6.8  | 43.92 | 49.3 | 20.9 | 14.9 |
| 30 | CON-HGO [33]        | 20 | 89.4 | 57.9 | 21.6 | 36.26 | 42.2 | 14.3 | 11.4 |
| 31 | HSVGO [34]          |    |      | 33.8 | 10.9 | 22.9  | 42.5 | 17.6 | 10.1 |
| 32 | Mixed feed [34]     |    |      | 27.1 | 10.4 | 16.7  | 66.3 | 15.2 | 19.8 |
| 33 | OHCU bottom [34]    |    |      | 84.6 | 31.4 | 53.2  | 15.2 | 12.1 | 0.7  |
| 34 | HVGO [34]           |    |      | 54.0 | 33.8 | 20.2  | 42.9 | 15.1 | 11.6 |
| 35 | Brass River [35]    |    |      | 64.7 | 22.4 | 42.3  | 32.3 | 9.1  | 7.8  |
| 36 | Lagomedio [35]      |    |      | 46.7 | 11.0 | 35.7  | 35.0 | 9.5  | 6.8  |
| 37 | Maya [35]           |    |      | 38.3 | 10.1 | 28.2  | 38.2 | 11.4 | 6.0  |
| 38 | Wilmington [35]     |    |      | 46.8 | 0.0  | 46.8  | 44.3 | 9.8  | 12.9 |
| 39 | Merey [35]          |    |      | 44.1 | 4.8  | 39.3  | 39.3 | 11.6 | 7.4  |
| 40 | DQ-VGO [36]         |    |      | 83.0 |      |       | 15.5 | 7.5  | 3.5  |
| 41 | DG-CGO [36]         |    |      | 60.8 |      |       | 30.5 | 6.9  | 13.5 |
| 42 | FCC SLO(CLO-1) [37] | 82 |      | 0.8  |      |       | 99.2 |      | 0.8  |
| 43 | FCC SLO(CLO-2) [37] | 79 |      | 0.9  |      |       | 99.1 |      |      |
| 44 | FCC SLO(CLO-3) [37] | 76 |      | 2.3  |      |       | 97.7 |      | 2.6  |
| 45 | FCC SLO(CLO-4) [37] | 77 |      | 5.8  |      |       | 94.2 |      |      |

|    |                         |    |       |   |       |      |      |      |
|----|-------------------------|----|-------|---|-------|------|------|------|
| 46 | FCC SLO(CLO-5) [37]     | 60 | 10.2  |   | 89.8  |      |      |      |
| 47 | FCC SLO(CLO-6) [37]     | 57 | 14.9  |   | 85.1  |      | 8.1  |      |
| 48 | FCC SLO(CLO-7) [37]     | 59 | 15.8  |   | 84.2  |      | 5.9  |      |
| 49 | FCC SLO(CLO-8) [37]     | 51 | 19.8  |   | 80.2  |      | 14.2 |      |
| 50 | FCC SLO(CLO-9) [37]     | 52 | 22.4  |   | 77.6  |      | 6.8  |      |
| 51 | FCC SLO(CLO-10)<br>[37] | 49 | 23.5  |   | 76.5  |      |      |      |
| 52 | FCC SLO(CLO-11)<br>[37] | 48 | 25.7  |   | 74.3  |      | 8.3  |      |
| 53 | FCC SLO(CLO-12)<br>[37] | 50 | 21.9  |   | 78.1  |      |      |      |
| 54 | FCC SLO(CLO-13)<br>[37] | 45 | 29.6  |   | 70.4  |      | 34.2 |      |
| 55 | FCC SLO(CLO-14)<br>[37] | 30 | 34.9  |   | 65.1  |      | 42.6 |      |
| 56 | FCC SLO(CLO-15)<br>[37] | 37 | 38.9  |   | 61.1  |      | 24.9 |      |
| 57 | FCC SLO [38]            |    | 38.08 |   | 47.82 |      |      |      |
| 58 | FCC SLO -A1 [39]        | 62 | 23    |   | 38    |      |      |      |
| 59 | FCC SLO -A2 [39]        | 58 | 30    |   | 42    |      |      |      |
| 60 | FCC SLO -B [39]         | 69 | 4     |   | 31    |      |      |      |
| 61 | FCC SLO -C [39]         | 67 | 8     |   | 33    |      |      |      |
| 62 | FCC SLO -D [39]         | 57 | 27    |   | 43    |      |      |      |
| 63 | FCC SLO -E [39]         | 55 | 39    |   | 45    |      |      |      |
| 64 | FCC SLO -F [39]         | 61 | 31    |   | 39    |      |      |      |
| 65 | FCC SLO -G [39]         | 59 | 36    |   | 41    |      |      |      |
| 66 | LSVR [39]               | 18 | 52    |   | 82    |      |      |      |
| 67 | Bitumen GV-1 [15]       |    | 46.5  | 6 | 40.5  | 48.6 | 23   | 15.9 |



|    |                   |      |     |      |      |      |      |
|----|-------------------|------|-----|------|------|------|------|
| 68 | Bitumen GV-2 [15] | 47.3 | 4.4 | 42.9 | 47   | 23.7 | 16.7 |
| 69 | Bitumen GV-3 [15] | 43.5 | 3.4 | 40   | 50   | 24.4 | 17.5 |
| 70 | Bitumen GV-4 [15] | 44.6 | 3.8 | 40.8 | 49.4 | 25.9 | 17.9 |
| 71 | Bitumen GV-5 [15] | 40.5 | 3.2 | 37.3 | 52.6 | 27.9 | 18.4 |
| 72 | Bitumen GV-6 [15] | 32.5 | 1.9 | 30.6 | 58.5 | 28.9 | 22.2 |
| 73 | VGO [34]          | 83.5 |     |      | 16.5 |      |      |
| 74 | VGO [34]          | 23.5 |     |      | 76.5 |      |      |

| feed<br>number | feed name     | tri-<br>ARO | tetra-<br>and<br>greater<br>ARO | Aromatic<br>Sulfur | Polar<br>Compounds |
|----------------|---------------|-------------|---------------------------------|--------------------|--------------------|
| 1              | HCB [2]       | 0.3         | 0.5                             | 0.3                | 0.7                |
| 2              | HT--VIR [2]   | 3.9         | 4.0                             | 2.8                | 0.9                |
| 3              | RZ [2]        | 3.7         | 3.4                             | 3.7                | 2.9                |
| 4              | HT-LCF [2]    | 4.9         | 3.7                             | 2.6                | 2.0                |
| 5              | HT-C [2]      | 6.3         | 6.1                             | 4.2                | 3.8                |
| 6              | HT-DA [2]     | 5.4         | 5.1                             | 3.4                | 7.1                |
| 7              | VIR [2]       | 7.2         | 8.0                             | 10.7               | 5.7                |
| 8              | LCF [2]       | 7.3         | 8.4                             | 6.8                | 6.1                |
| 9              | DA-LCF [2]    | 6.0         | 6.6                             | 5.4                | 11.8               |
| 10             | DA-BIT [2]    | 5.7         | 6.3                             | 9.1                | 15.2               |
| 11             | BG LIGHT [3]  | 2.8         | 2.2                             | 1.7                | 1.2                |
| 12             | PEMBINA [3]   | 3.5         | 2.2                             | 1.1                | 2.2                |
| 13             | EKOFISK [3]   | 4.5         | 2.7                             | 1.4                | 3.9                |
| 14             | BRENT [3]     | 4.6         | 4.5                             | 1.9                | 3.0                |
| 15             | BOW RIVER [3] | 5.9         | 4.3                             | 7.1                | 3.0                |
| 16             | COLD LAKE [3] | 6.1         | 5.0                             | 6.7                | 2.2                |
| 17             | CANMENT [3]   | 5.3         | 3.0                             | 7.6                | 6.2                |
| 18             | VISBROKEN [3] | 15.1        | 8.2                             | 7.3                | 2.9                |
| 19             | COKER [3]     | 10.0        | 9.2                             | 9.5                | 9.3                |
| 20             | VGO [4]       |             | 11.1                            |                    | 4.6                |
| 21             | HVDI [4]      |             | 4.9                             |                    | 2.7                |

|    |                     |      |      |     |     |
|----|---------------------|------|------|-----|-----|
| 22 | HVD2 [4]            |      | 3.5  |     | 1.0 |
| 23 | HVD3 [4]            |      | 4.0  |     | 1.7 |
| 24 | H-Oil VGO [32]      | 8.2  | 8.9  |     | 3.0 |
| 25 | 5%FCC SLO [32]      | 9.2  | 11.0 |     | 3.4 |
| 26 | 10% FCC SLO [32]    | 10.7 | 13.0 |     | 4.3 |
| 27 | 15% FCC SLO [32]    | 11.5 | 14.4 |     | 4.8 |
| 28 | SCO-HGO [33]        | 9.1  |      | 3.6 | 3.3 |
| 29 | HTC-HGO [33]        | 10.2 |      | 2.3 | 1.1 |
| 30 | CON-HGO [33]        | 8.4  |      | 3.1 | 4.5 |
| 31 | HSVGO [34]          | 3.8  | 11.2 |     |     |
| 32 | Mixed feed [34]     | 9.0  |      |     |     |
| 33 | OHCU bottom [34]    | 0.1  |      |     |     |
| 34 | HVGO [34]           | 6.1  |      |     |     |
| 35 | Brass River [35]    | 7.4  | 1.7  |     |     |
| 36 | Lagomedio [35]      | 9.4  | 3.2  |     |     |
| 37 | Maya [35]           | 9.5  | 6.9  |     |     |
| 38 | Wilmington [35]     | 9.8  | 6.5  |     |     |
| 39 | Merrey [35]         | 9.5  | 4.8  |     |     |
| 40 | DQ-VGO [36]         | 4.5  |      |     | 1.3 |
| 41 | DG-CGO [36]         | 10.1 |      |     | 8.7 |
| 42 | FCC SLO(CLO-1) [37] | 24.3 | 74.9 |     |     |
| 43 | FCC SLO(CLO-2) [37] |      |      |     |     |
| 44 | FCC SLO(CLO-3) [37] | 27.0 | 70.4 |     |     |
| 45 | FCC SLO(CLO-4) [37] |      |      |     |     |

|    |                      |      |      |     |
|----|----------------------|------|------|-----|
| 46 | FCC SLO(CLO-5) [37]  |      |      |     |
| 47 | FCC SLO(CLO-6) [37]  | 31.5 | 60.4 |     |
| 48 | FCC SLO(CLO-7) [37]  | 34.6 | 59.6 |     |
| 49 | FCC SLO(CLO-8) [37]  | 44.8 | 41.1 |     |
| 50 | FCC SLO(CLO-9) [37]  | 32.8 | 60.4 |     |
| 51 | FCC SLO(CLO-10) [37] |      |      |     |
| 52 | FCC SLO(CLO-11) [37] | 37.7 | 54.1 |     |
| 53 | FCC SLO(CLO-12) [37] |      |      |     |
| 54 | FCC SLO(CLO-13) [37] | 28.0 | 37.8 |     |
| 55 | FCC SLO(CLO-14) [37] | 16.2 | 41.2 |     |
| 56 | FCC SLO(CLO-15) [37] | 45.3 | 29.8 |     |
| 57 | FCC SLO [38]         |      |      |     |
| 58 | FCC SLO -A1 [39]     |      |      |     |
| 59 | FCC SLO -A2 [39]     |      |      |     |
| 60 | FCC SLO -B [39]      |      |      |     |
| 61 | FCC SLO -C [39]      |      |      |     |
| 62 | FCC SLO -D [39]      |      |      |     |
| 63 | FCC SLO -E [39]      |      |      |     |
| 64 | FCC SLO -F [39]      |      |      |     |
| 65 | FCC SLO -G [39]      |      |      |     |
| 66 | LSVR [39]            |      |      |     |
| 67 | Bitumen GV-1 [15]    | 8    | 1.3  | 0.4 |

|    |                   |     |     |     |
|----|-------------------|-----|-----|-----|
| 68 | Bitumen GV-2 [15] | 5.1 | 1   | 0.4 |
| 69 | Bitumen GV-3 [15] | 5.1 | 2.2 | 0.7 |
| 70 | Bitumen GV-4 [15] | 4.4 | 1   | 0.1 |
| 71 | Bitumen GV-5 [15] | 4.8 | 1   | 0.5 |
| 72 | Bitumen GV-6 [15] | 5   | 1.1 | 1.3 |
| 73 | VGO [35]          |     |     |     |
| 74 | VGO [35]          |     |     |     |

Table S2 Empirically modeled characterizing parameters of the vacuum gas oils under study

| VGO<br>number | feed name | CA<br>(ndM) | CN<br>(ndM) | CP<br>(ndM) | P (API) | N<br>(API) | A<br>(API) | Hydrogen<br>content,<br>wt.<br>(Goosens) | Hydrogen<br>content,<br>wt.%<br>(COP) | C <sub>A</sub> ,<br>wt.%<br>(COP) | I/d  | ARI |
|---------------|-----------|-------------|-------------|-------------|---------|------------|------------|------------------------------------------|---------------------------------------|-----------------------------------|------|-----|
| 1             | HCB       | 1.8         | 31.9        | 66.2        | 67.1    | 26.1       | 6.8        | 13.7                                     | 13.6                                  | 4.3                               | 0.33 | 0.7 |
| 2             | HT--VIR   | 23.7        | 20.1        | 56.2        | 64.3    | 20.6       | 15.1       | 12.3                                     | 12.2                                  | 16.7                              | 0.32 | 2.0 |
| 3             | RZ        | 26.6        | 20.9        | 52.5        | 60.4    | 23.2       | 16.4       | 12.1                                     | 12.0                                  | 20.3                              | 0.33 | 1.3 |
| 4             | HT-LCF    | 22.3        | 34.2        | 43.5        | 57.0    | 23.2       | 19.8       | 11.5                                     | 11.5                                  | 24.6                              | 0.32 | 1.9 |
| 5             | HT-C      | 36.5        | 7.8         | 55.7        | 67.7    | 11.4       | 20.8       | 11.1                                     | 11.1                                  | 25.9                              | 0.33 | 2.5 |
| 6             | HT-DA     | 37.8        | 16.1        | 46.0        | 53.6    | 25.2       | 21.1       | 11.2                                     | 11.2                                  | 30.2                              | 0.33 | 2.7 |
| 7             | VIR       | 38.2        | 12.3        | 49.5        | 59.8    | 19.1       | 21.2       | 11.2                                     | 11.1                                  | 28.1                              | 0.32 | 3.1 |
| 8             | LCF       | 30.5        | 15.6        | 53.9        | 74.4    | 4.9        | 20.7       | 11.1                                     | 11.0                                  | 24.2                              | 0.32 | 2.2 |
| 9             | DA-LCF    | 38.9        | 14.2        | 46.9        | 56.1    | 17.4       | 26.6       | 10.17                                    | 10.1                                  | 40.1                              | 0.32 | 2.6 |
| 10            | DA-BIT    | 24.9        | 18.1        | 57.0        | 66.8    | 16.3       | 17.0       | 11.84                                    | 11.7                                  | 20.7                              | 0.32 | 3.6 |
| 11            | BG LIGHT  | 11.7        | 25.3        | 62.9        | 65.6    | 26.5       | 8.0        | 13.3                                     | 13.4                                  | 9.9                               | 0.33 | 0.8 |
| 12            | PEMBINA   | 13.6        | 29.3        | 57.1        | 64.7    | 24.9       | 10.4       | 12.9                                     | 12.8                                  | 14.4                              | 0.33 | 1.2 |
| 13            | EKOFISK   | 17.6        | 23.6        | 58.8        | 66.0    | 23.0       | 11.0       | 12.8                                     | 12.6                                  | 15.7                              | 0.33 | 1.4 |
| 14            | BRENT     | 20.2        | 19.9        | 59.9        | 62.8    | 25.5       | 11.7       | 12.7                                     | 12.7                                  | 16.3                              | 0.33 | 1.3 |
| 15            | BOW RIVER | 23.3        | 24.2        | 52.5        | 56.9    | 26.4       | 16.7       | 11.6                                     | 11.8                                  | 26.2                              | 0.32 | 1.7 |
| 16            | COLD LAKE | 23.0        | 26.1        | 50.9        | 55.5    | 27.4       | 17.1       | 11.6                                     | 11.8                                  | 25.7                              | 0.33 | 1.6 |
| 17            | CANMENT   | 34.3        | 18.7        | 47.0        | 42.6    | 33.8       | 23.5       | 10.6                                     | 11.3                                  | 33.8                              | 0.33 | 1.7 |
| 18            | VISBROKEN | 54.3        | -6.2        | 51.8        | 37.6    | 33.3       | 29.1       | 10.1                                     | 10.7                                  | 39.6                              | 0.33 | 2.3 |
| 19            | COKER     | 47.6        | 10.4        | 42.0        | 35.8    | 31.8       | 32.3       | 9.5                                      | 9.8                                   | 47.8                              | 0.33 | 2.6 |
| 20            | VGO       |             |             |             | 56.3    | 28.7       | 15.0       | 12.2                                     | 12.2                                  | 20.6                              | 0.33 |     |
| 21            | HVD1      |             |             |             | 63.3    | 26.0       | 10.7       | 12.8                                     | 12.7                                  | 15.5                              | 0.33 |     |
| 22            | HVD2      |             |             |             | 75.3    | 21.2       | 3.5        | 13.8                                     | 13.4                                  | 7.0                               | 0.33 |     |
| 23            | HVD3      |             |             |             | 72.1    | 22.0       | 5.9        | 13.4                                     | 13.3                                  | 9.7                               | 0.33 |     |

|    |                   |       |      |      |       |      |      |      |      |       |      |      |
|----|-------------------|-------|------|------|-------|------|------|------|------|-------|------|------|
|    | H-Oil             |       |      |      |       |      |      |      |      |       |      |      |
| 24 | VGO(IFP)          | 25.2  | 24.6 | 50.2 | 59.6  | 23.7 | 16.7 | 11.9 | 11.7 | 25.1  | 0.33 |      |
| 25 | 5%FCC SLO         | 27.8  | 24.7 | 47.5 | 41.3  | 32.8 | 25.9 | 11.6 | 11.5 | 28.0  | 0.33 |      |
| 26 | 10% FCC SLO       | 30.5  | 24.8 | 44.7 | 22.9  | 41.9 | 35.2 | 11.3 | 11.2 | 30.9  | 0.33 |      |
| 27 | 15% FCC SLO       | 33.1  | 24.9 | 42.0 | 4.4   | 51.1 | 44.5 | 11.1 | 10.9 | 33.9  | 0.33 |      |
| 28 | SCO-HGO           | 34.4  | 17.7 | 47.9 | 49.1  | 29.2 | 21.8 | 11.2 | 11.4 | 30.0  | 0.33 |      |
| 29 | HTC-HGO           | 30.3  | 20.4 | 49.3 | 52.3  | 28.1 | 19.5 | 11.5 | 11.7 | 26.8  | 0.33 |      |
| 30 | CON-HGO           | 21.0  | 22.2 | 56.7 | 62.2  | 24.5 | 13.3 | 12.3 | 12.3 | 19.6  | 0.33 |      |
| 31 | HSVGO             |       |      |      |       |      |      |      |      |       |      |      |
| 32 | Mixed feed        |       |      |      |       |      |      |      |      |       |      |      |
| 33 | OHCU bottom       |       |      |      |       |      |      |      |      |       |      |      |
| 34 | HVGO              |       |      |      |       |      |      |      |      |       |      |      |
| 35 | Brass River       |       |      |      |       |      |      |      |      |       |      |      |
| 36 | Lagomedio         |       |      |      |       |      |      |      |      |       |      |      |
| 37 | Maya              |       |      |      |       |      |      |      |      |       |      |      |
| 38 | Wilmington        |       |      |      |       |      |      |      |      |       |      |      |
| 39 | Merey             |       |      |      |       |      |      |      |      |       |      |      |
| 40 | DQ-VGO            | -34.2 | 70.7 | 63.5 | -31.1 | 88.0 | 43.1 | 17.8 | 15.2 | -12.4 | 0.31 | -1.6 |
| 41 | DG-CGO            | 30.8  | 11.1 | 58.1 | -4.1  | 60.0 | 44.1 | 11.7 | 12.3 | 22.0  | 0.33 | 1.6  |
| 42 | FCC<br>SLO(CLO-1) | 84.2  | 4.9  | 11.0 | 18.6  | 36.4 | 45.0 | 7.22 | 6.3  | 108.4 | 0.33 | 3.2  |
| 43 | FCC<br>SLO(CLO-2) | 82.6  | 2.5  | 14.9 | 23.8  | 31.0 | 45.2 | 7.36 | 6.3  | 108.7 | 0.33 | 3.5  |
| 44 | FCC<br>SLO(CLO-3) | 76.0  | 5.1  | 18.9 | 16.4  | 38.7 | 44.9 | 7.77 | 6.9  | 102.3 | 0.33 | 3.0  |
| 45 | FCC<br>SLO(CLO-4) | 75.5  | 6.4  | 18.1 | 15.1  | 40.0 | 44.9 | 7.79 | 6.9  | 101.6 | 0.33 | 3.0  |
| 46 | FCC<br>SLO(CLO-5) | 53.4  | 16.6 | 30.1 | 9.4   | 45.9 | 44.7 | 9.40 | 8.4  | 85.2  | 0.33 | 2.6  |

[illegible]



|    |              |      |      |      |       |      |      |      |      |      |      |      |
|----|--------------|------|------|------|-------|------|------|------|------|------|------|------|
| 67 | Bitumen GV-1 |      |      |      |       |      |      |      |      |      | 0.32 |      |
| 68 | Bitumen GV-2 |      |      |      |       |      |      |      |      |      | 0.33 |      |
| 69 | Bitumen GV-3 |      |      |      |       |      |      |      |      |      | 0.32 |      |
| 70 | Bitumen GV-4 |      |      |      |       |      |      |      |      |      | 0.33 |      |
| 71 | Bitumen GV-5 |      |      |      |       |      |      |      |      |      | 0.32 |      |
| 72 | Bitumen GV-6 |      |      |      |       |      |      |      |      |      | 0.32 |      |
|    | -            |      |      |      |       |      |      |      |      |      |      |      |
| 73 | VGO [35]     | 15.8 | 62.6 | 53.1 | -20.4 | 76.9 | 43.5 | 15.8 | 14.1 | 2.2  | 0.32 | -0.1 |
| 74 | VGO [35]     | 40.3 | 15.7 | 44.0 | 11.8  | 43.4 | 44.8 | 10.4 | 10.2 | 40.4 | 0.32 | 2.8  |

Table S3 Data for density at 15°C and content of aromatic structures (aromatic, resin, and asphaltene fractions) in 144 vacuum gas oils (taken from ref. 51)

| Nr | density at<br>15°C,<br>g/cm <sup>3</sup> | VGO<br>ARO,<br>wt.% | Nr  | density at<br>15°C,<br>g/cm <sup>3</sup> | VGO<br>ARO,<br>wt.% | Nr  | density at<br>15°C,<br>g/cm <sup>3</sup> | VGO<br>ARO,<br>wt.% |
|----|------------------------------------------|---------------------|----|------------------------------------------|---------------------|----|------------------------------------------|---------------------|----|------------------------------------------|---------------------|-----|------------------------------------------|---------------------|-----|------------------------------------------|---------------------|
| 1  | 0.864                                    | 26.3                | 25 | 0.900                                    | 36.6                | 49 | 0.903                                    | 47.7                | 73 | 0.927                                    | 34.0                | 97  | 0.964                                    | 59.1                | 121 | 0.910                                    | 30.5                |
| 2  | 0.893                                    | 28.2                | 26 | 0.895                                    | 40.2                | 50 | 0.941                                    | 52.8                | 74 | 0.901                                    | 57.6                | 98  | 0.978                                    | 61.8                | 122 | 1.127                                    | 99.2                |
| 3  | 0.902                                    | 38.2                | 27 | 0.878                                    | 30.6                | 51 | 0.918                                    | 48.0                | 75 | 0.925                                    | 55.0                | 99  | 0.864                                    | 27.5                | 123 | 1.128                                    | 99.1                |
| 4  | 0.894                                    | 37.1                | 28 | 0.866                                    | 24.1                | 52 | 0.970                                    | 49.5                | 76 | 0.869                                    | 31.7                | 100 | 0.893                                    | 30.5                | 124 | 1.103                                    | 97.7                |
| 5  | 0.932                                    | 51.9                | 29 | 0.924                                    | 47.9                | 53 | 0.864                                    | 9.9                 | 77 | 0.923                                    | 51.6                | 101 | 0.902                                    | 42.0                | 125 | 1.100                                    | 94.2                |
| 6  | 0.928                                    | 50.0                | 30 | 0.915                                    | 42.1                | 54 | 0.925                                    | 53.2                | 78 | 0.914                                    | 40.7                | 102 | 0.894                                    | 40.1                | 126 | 1.038                                    | 89.8                |
| 7  | 0.944                                    | 52.6                | 31 | 0.919                                    | 52.7                | 55 | 0.928                                    | 54.3                | 79 | 0.861                                    | 21.5                | 103 | 0.932                                    | 54.8                | 127 | 1.036                                    | 85.1                |
| 8  | 0.969                                    | 59.7                | 32 | 1.089                                    | 87.5                | 56 | 0.951                                    | 65.6                | 80 | 0.859                                    | 19.6                | 104 | 0.928                                    | 52.2                | 128 | 1.042                                    | 84.2                |
| 9  | 1.008                                    | 74.7                | 33 | 0.861                                    | 29.0                | 57 | 0.971                                    | 71.3                | 81 | 0.875                                    | 14.2                | 105 | 0.944                                    | 58.8                | 129 | 1.007                                    | 80.2                |
| 10 | 0.925                                    | 50.7                | 34 | 0.913                                    | 42.9                | 58 | 0.956                                    | 64.5                | 82 | 0.895                                    | 30.8                | 106 | 0.969                                    | 62.6                | 130 | 1.013                                    | 77.6                |
| 11 | 0.924                                    | 45.4                | 35 | 0.921                                    | 49.1                | 59 | 0.964                                    | 70.9                | 83 | 0.852                                    | 15.8                | 107 | 1.008                                    | 84.0                | 131 | 0.998                                    | 76.5                |
| 12 | 0.920                                    | 47.3                | 36 | 0.879                                    | 21.5                | 60 | 0.978                                    | 77.0                | 84 | 0.896                                    | 40.0                | 108 | 0.911                                    | 49.0                | 132 | 0.999                                    | 74.3                |
| 13 | 0.906                                    | 41.0                | 37 | 0.918                                    | 48.0                | 61 | 1.004                                    | 79.7                | 85 | 0.914                                    | 53.6                | 109 | 0.895                                    | 43.6                | 133 | 1.006                                    | 78.1                |
| 14 | 0.863                                    | 18.6                | 38 | 0.938                                    | 61.9                | 62 | 0.943                                    | 64.6                | 86 | 0.898                                    | 46.8                | 110 | 0.865                                    | 27.7                | 134 | 0.984                                    | 70.4                |
| 15 | 0.872                                    | 23.2                | 39 | 0.918                                    | 52.7                | 63 | 0.892                                    | 49.3                | 87 | 0.868                                    | 29.4                | 111 | 0.869                                    | 33.1                | 135 | 0.952                                    | 65.1                |
| 16 | 0.928                                    | 53.9                | 40 | 0.902                                    | 45.1                | 64 | 0.914                                    | 51.8                | 88 | 0.872                                    | 34.8                | 112 | 0.936                                    | 44.2                | 136 | 0.939                                    | 61.1                |
| 17 | 0.880                                    | 19.6                | 41 | 0.872                                    | 26.1                | 65 | 0.927                                    | 52.7                | 89 | 0.864                                    | 9.3                 | 113 | 0.942                                    | 55.1                | 137 | 1.038                                    | 77.0                |
| 18 | 0.901                                    | 33.0                | 42 | 0.879                                    | 27.3                | 66 | 0.930                                    | 53.8                | 90 | 0.925                                    | 52.3                | 114 | 0.932                                    | 49.3                | 138 | 1.005                                    | 70.0                |
| 19 | 0.942                                    | 55.1                | 43 | 0.886                                    | 33.0                | 67 | 0.938                                    | 55.4                | 91 | 0.899                                    | 36.1                | 115 | 0.911                                    | 42.2                | 139 | 1.065                                    | 96.0                |
| 20 | 0.932                                    | 49.3                | 44 | 0.891                                    | 34.0                | 68 | 0.947                                    | 64.8                | 92 | 0.928                                    | 52.3                | 116 | 0.899                                    | 32.3                | 140 | 1.037                                    | 92.0                |
| 21 | 0.911                                    | 42.2                | 45 | 0.896                                    | 36.6                | 69 | 0.924                                    | 47.6                | 93 | 0.951                                    | 61.8                | 117 | 0.906                                    | 35.0                | 141 | 0.988                                    | 73.0                |
| 22 | 0.915                                    | 48.5                | 46 | 0.903                                    | 42.3                | 70 | 0.938                                    | 49.7                | 94 | 0.943                                    | 57.5                | 118 | 0.932                                    | 38.2                | 142 | 0.962                                    | 60.0                |
| 23 | 0.900                                    | 40.0                | 47 | 0.937                                    | 53.4                | 71 | 0.902                                    | 39.1                | 95 | 0.971                                    | 65.6                | 119 | 0.957                                    | 44.3                | 143 | 0.995                                    | 69.0                |
| 24 | 0.901                                    | 47.0                | 48 | 0.930                                    | 63.7                | 72 | 0.936                                    | 52.6                | 96 | 0.956                                    | 58.4                | 120 | 0.930                                    | 39.3                | 144 | 0.993                                    | 64.0                |

Table S4 Comparison between measured and predicted by the empirical correlations refractive index of VGO from different origin

| RI<br>(measured)           | RI<br>(eq.30) | RI<br>(eq.31) | RI<br>(Fig.1b) | RI<br>(eq.17) | RI<br>(eq.13) | Abs. dev. (eq.30) | Abs. dev. (eq.31) | Abs. dev. (Fig.1b) | Abs. dev. (eq.17) | Abs. dev. (eq.13) |
|----------------------------|---------------|---------------|----------------|---------------|---------------|-------------------|-------------------|--------------------|-------------------|-------------------|
| 1.4747                     | 1.4723        | 1.4738        | 1.4764         | 1.4788        | 1.4712        | 0.0024            | 0.0016            | 0.0026             | 0.0023            | 0.0075            |
| 1.5130                     | 1.5073        | 1.5213        | 1.5150         | 1.5166        | 1.5092        | 0.0057            | 0.0140            | 0.0062             | 0.0015            | 0.0074            |
| 1.4967                     | 1.4976        | 1.5007        | 1.4983         | 1.5025        | 1.4891        | 0.0009            | 0.0031            | 0.0024             | 0.0042            | 0.0134            |
| 1.5153                     | 1.5134        | 1.5238        | 1.5170         | 1.5204        | 1.5094        | 0.0019            | 0.0103            | 0.0067             | 0.0033            | 0.0109            |
| 1.5323                     | 1.5260        | 1.5414        | 1.5314         | 1.5344        | 1.5269        | 0.0063            | 0.0154            | 0.0100             | 0.0029            | 0.0074            |
| 1.5269                     | 1.5140        | 1.5351        | 1.5263         | 1.5262        | 1.5249        | 0.0129            | 0.0211            | 0.0088             | 0.0001            | 0.0013            |
| 1.5397                     | 1.5336        | 1.5571        | 1.5442         | 1.5452        | 1.5461        | 0.0061            | 0.0235            | 0.0129             | 0.0011            | 0.0009            |
| 1.5324                     | 1.5355        | 1.5454        | 1.5347         | 1.5404        | 1.5287        | 0.0031            | 0.0100            | 0.0107             | 0.0058            | 0.0117            |
| 1.5370                     | 1.5347        | 1.5516        | 1.5397         | 1.5430        | 1.5372        | 0.0023            | 0.0169            | 0.0119             | 0.0033            | 0.0058            |
| 1.5393                     | 1.5331        | 1.5621        | 1.5482         | 1.5475        | 1.5548        | 0.0062            | 0.0290            | 0.0139             | 0.0007            | 0.0073            |
| 1.4786                     | 1.4802        | 1.4736        | 1.4763         | 1.4821        | 1.4688        | 0.0016            | 0.0066            | 0.0027             | 0.0058            | 0.0133            |
| 1.4936                     | 1.4950        | 1.4963        | 1.4948         | 1.4992        | 1.4855        | 0.0014            | 0.0014            | 0.0016             | 0.0045            | 0.0138            |
| 1.5013                     | 1.4993        | 1.5031        | 1.5003         | 1.5044        | 1.4911        | 0.0020            | 0.0038            | 0.0028             | 0.0041            | 0.0133            |
| 1.4990                     | 1.4977        | 1.4967        | 1.4951         | 1.5007        | 1.4852        | 0.0013            | 0.0010            | 0.0017             | 0.0056            | 0.0154            |
| 1.5171                     | 1.5226        | 1.5262        | 1.5190         | 1.5256        | 1.5096        | 0.0055            | 0.0035            | 0.0072             | 0.0066            | 0.0160            |
| 1.5154                     | 1.5210        | 1.5237        | 1.5170         | 1.5237        | 1.5073        | 0.0056            | 0.0026            | 0.0067             | 0.0068            | 0.0164            |
| 1.5297                     | 1.5370        | 1.5357        | 1.5268         | 1.5368        | 1.5187        | 0.0073            | 0.0012            | 0.0089             | 0.0100            | 0.0182            |
| 1.5588                     | 1.5524        | 1.5552        | 1.5426         | 1.5530        | 1.5385        | 0.0064            | 0.0028            | 0.0126             | 0.0104            | 0.0145            |
| 1.5695                     | 1.5752        | 1.5855        | 1.5673         | 1.5776        | 1.5739        | 0.0057            | 0.0103            | 0.0182             | 0.0104            | 0.0038            |
| Average absolute deviation |               |               |                |               |               | 0.0044            | 0.0094            | 0.0078             | 0.0047            | 0.0104            |

Table S5 Comparison between measured and predicted by the empirical correlations hydrogen content in VGO from different origin

| Hydrogen, wt.%<br>measured       | RI (Fig. 1d) | H (Goosens; eq.22) | H (COP; eq.24) | H (Dhulesia; eq.16) | Abs. dev. (Fig.1d) | Abs.<br>dev.<br>(eq.22) | Abs.<br>dev.<br>(eq.24) | Abs.<br>dev.<br>(eq.16) |
|----------------------------------|--------------|--------------------|----------------|---------------------|--------------------|-------------------------|-------------------------|-------------------------|
| 13.7                             | 13.6         | 14.2               | 13.59          | 13.81               | 0.10               | 0.50                    | 0.11                    | 0.11                    |
| 12.3                             | 12.1         | 12.9               | 12.15          | 12.60               | 0.17               | 0.58                    | 0.15                    | 0.30                    |
| 12.8                             | 12.8         | 12.9               | 12.66          | 14.11               | 0.05               | 0.08                    | 0.14                    | 1.31                    |
| 12.1                             | 12.0         | 12.4               | 11.98          | 12.36               | 0.06               | 0.31                    | 0.12                    | 0.26                    |
| 11.5                             | 11.4         | 12.0               | 11.46          | 11.90               | 0.11               | 0.51                    | 0.04                    | 0.40                    |
| 11.8                             | 11.6         | 12.8               | 11.81          | 12.24               | 0.21               | 1.04                    | 0.01                    | 0.44                    |
| 11.1                             | 11.1         | 12.0               | 11.07          | 11.74               | 0.00               | 0.91                    | 0.03                    | 0.64                    |
| 11.2                             | 11.4         | 11.3               | 11.20          | 11.48               | 0.18               | 0.10                    | 0.00                    | 0.28                    |
| 11.2                             | 11.2         | 11.7               | 11.13          | 11.62               | 0.01               | 0.47                    | 0.07                    | 0.42                    |
| 11.1                             | 11.1         | 12.2               | 11.01          | 11.96               | 0.02               | 1.15                    | 0.09                    | 0.86                    |
| 13.4                             | 13.4         | 13.3               | 13.42          | 13.30               | 0.05               | 0.07                    | 0.02                    | 0.10                    |
| 12.8                             | 12.9         | 12.9               | 12.78          | 12.83               | 0.07               | 0.13                    | 0.02                    | 0.03                    |
| 12.6                             | 12.6         | 12.8               | 12.58          | 12.49               | 0.02               | 0.22                    | 0.02                    | 0.11                    |
| 12.7                             | 12.7         | 12.7               | 12.71          | 12.85               | 0.04               | 0.04                    | 0.01                    | 0.15                    |
| 11.8                             | 12.0         | 11.6               | 11.75          | 11.73               | 0.17               | 0.20                    | 0.05                    | 0.07                    |
| 11.8                             | 12.0         | 11.6               | 11.82          | 11.77               | 0.23               | 0.17                    | 0.02                    | 0.03                    |
| 11.3                             | 11.5         | 10.6               | 11.31          | 11.06               | 0.19               | 0.69                    | 0.01                    | 0.24                    |
| 10.7                             | 10.4         | 10.1               | 10.70          | 10.09               | 0.33               | 0.60                    | 0.00                    | 0.61                    |
| 9.8                              | 10.0         | 9.5                | 9.77           | 9.80                | 0.16               | 0.31                    | 0.03                    | 0.00                    |
| Average absolute deviation, wt.% |              |                    |                |                     | 0.11               | 0.43                    | 0.05                    | 0.34                    |

Table S6 Comparison between measured and predicted by the empirical correlations aromatic carbon content in VGO from different origin

| C <sub>A</sub> wt.%<br>measured | C <sub>A</sub><br>(Fig.1c) | C <sub>A</sub><br>(Dhulesia;<br>eq.15) | C <sub>A</sub><br>(COP;<br>eq.23) | C <sub>A</sub><br>(eq.33). | C <sub>A</sub><br>(eq.32). | Abs. dev.<br>(eq.Fig.1c) | Abs.<br>dev.<br>(eq.15) | Abs.<br>dev.<br>(eq.23) | Abs.<br>dev.<br>(eq.33) | Abs.<br>dev.<br>(eq.32) |
|---------------------------------|----------------------------|----------------------------------------|-----------------------------------|----------------------------|----------------------------|--------------------------|-------------------------|-------------------------|-------------------------|-------------------------|
| 4.4                             | 3.8                        | 1.6                                    | 4.3                               | 3.9                        | 4.5                        | 0.6                      | 2.8                     | 0.1                     | 0.5                     | 0.1                     |
| 17.6                            | 20.6                       | 9.3                                    | 16.7                              | 18.8                       | 17.8                       | 3.0                      | 8.3                     | 0.9                     | 1.2                     | 0.2                     |
| 14.6                            | 14.6                       | 11.8                                   | 15.1                              | 15.8                       | 15.4                       | 0.0                      | 2.8                     | 0.5                     | 1.2                     | 0.8                     |
| 20.2                            | 23.0                       | 14.6                                   | 20.3                              | 22.3                       | 21.7                       | 2.8                      | 5.6                     | 0.1                     | 2.1                     | 1.5                     |
| 24.7                            | 30.2                       | 16.6                                   | 24.6                              | 27.6                       | 27.4                       | 5.5                      | 8.1                     | 0.1                     | 2.9                     | 2.7                     |
| 20.9                            | 26.6                       | 6.8                                    | 17.8                              | 20.8                       | 20.6                       | 5.7                      | 14.1                    | 3.1                     | 0.1                     | 0.3                     |
| 25.4                            | 34.9                       | 12.1                                   | 25.9                              | 29.9                       | 28.8                       | 9.5                      | 13.3                    | 0.5                     | 4.5                     | 3.4                     |
| 30.1                            | 33.7                       | 24.8                                   | 30.2                              | 33.0                       | 33.1                       | 3.6                      | 5.3                     | 0.1                     | 2.9                     | 3.0                     |
| 28.8                            | 33.7                       | 18.9                                   | 28.1                              | 31.5                       | 30.6                       | 4.9                      | 9.9                     | 0.7                     | 2.7                     | 1.8                     |
| 24.4                            | 34.9                       | 6.4                                    | 24.2                              | 28.8                       | 25.5                       | 10.5                     | 18.0                    | 0.2                     | 4.4                     | 1.1                     |
| 9.9                             | 7.4                        | 9.8                                    | 9.9                               | 9.0                        | 10.5                       | 2.5                      | 0.1                     | 0.0                     | 0.9                     | 0.6                     |
| 14.4                            | 14.6                       | 12.0                                   | 14.4                              | 14.9                       | 15.7                       | 0.2                      | 2.4                     | 0.0                     | 0.5                     | 1.3                     |
| 15.7                            | 17.0                       | 12.4                                   | 15.7                              | 16.6                       | 17.5                       | 1.3                      | 3.3                     | 0.0                     | 0.9                     | 1.8                     |
| 16.3                            | 15.8                       | 14.6                                   | 16.3                              | 16.6                       | 17.6                       | 0.5                      | 1.7                     | 0.0                     | 0.3                     | 1.3                     |
| 26.2                            | 26.6                       | 22.8                                   | 26.2                              | 27.8                       | 27.6                       | 0.4                      | 3.4                     | 0.0                     | 1.6                     | 1.4                     |
| 25.7                            | 26.6                       | 22.8                                   | 25.7                              | 27.2                       | 27.7                       | 0.9                      | 2.9                     | 0.0                     | 1.5                     | 2.0                     |
| 33.8                            | 32.6                       | 32.9                                   | 33.8                              | 35.5                       | 34.8                       | 1.2                      | 0.9                     | 0.0                     | 1.7                     | 1.0                     |
| 39.6                            | 39.7                       | 38.2                                   | 39.6                              | 42.3                       | 41.2                       | 0.1                      | 1.4                     | 0.0                     | 2.7                     | 1.6                     |
| 47.8                            | 50.5                       | 43.0                                   | 47.8                              | 52.1                       | 50.4                       | 2.7                      | 4.8                     | 0.0                     | 4.3                     | 2.6                     |
| 27.0                            |                            | 27.8                                   | 30.0                              | 32.0                       |                            |                          | 0.8                     | 3.0                     | 5.0                     |                         |
| 24.0                            |                            | 24.6                                   | 26.8                              | 28.5                       |                            |                          | 0.6                     | 2.8                     | 4.5                     |                         |
| 20.0                            |                            | 16.6                                   | 19.6                              | 20.6                       |                            |                          | 3.4                     | 0.4                     | 0.6                     |                         |
| 82.0                            | 85.1                       | 75.4                                   | 77.2                              | 84.4                       | 84.1                       | 3.1                      | 6.6                     | 4.8                     | 2.4                     | 2.1                     |
| 79.0                            | 85.4                       | 75.6                                   | 74.6                              | 82.1                       | 83.4                       | 6.4                      | 3.4                     | 4.4                     | 3.1                     | 4.4                     |
| 76.0                            | 77.9                       | 81.2                                   | 70.9                              | 77.4                       | 77.2                       | 1.9                      | 5.2                     | 5.1                     | 1.4                     | 1.2                     |

|                                  |      |      |      |      |      |      |      |      |      |      |
|----------------------------------|------|------|------|------|------|------|------|------|------|------|
| 77.0                             | 77.0 | 77.6 | 70.9 | 77.2 | 76.6 | 0.0  | 0.6  | 6.1  | 0.2  | 0.4  |
| 60.0                             | 57.9 | 51.8 | 53.5 | 58.1 | 58.0 | 2.1  | 8.2  | 6.5  | 1.9  | 2.0  |
| 57.0                             | 57.4 | 48.7 | 51.8 | 56.5 | 57.0 | 0.4  | 8.3  | 5.2  | 0.5  | 0.0  |
| 59.0                             | 59.1 | 45.0 | 51.0 | 56.0 | 57.7 | 0.1  | 14.0 | 8.0  | 3.0  | 1.3  |
| 51.0                             | 48.6 | 34.5 | 40.8 | 44.9 | 46.9 | 2.4  | 16.5 | 10.2 | 6.1  | 4.1  |
| 52.0                             | 50.3 | 38.1 | 43.4 | 47.5 | 49.1 | 1.7  | 13.9 | 8.6  | 4.5  | 2.9  |
| 49.0                             | 45.7 | 36.7 | 40.7 | 44.3 | 45.3 | 3.3  | 12.3 | 8.3  | 4.7  | 3.7  |
| 48.0                             | 46.1 | 36.1 | 40.5 | 44.2 | 45.4 | 1.9  | 11.9 | 7.5  | 3.8  | 2.6  |
| 50.0                             | 48.3 | 37.6 | 42.2 | 46.2 | 47.5 | 1.7  | 12.4 | 7.8  | 3.8  | 2.5  |
| 45.0                             | 41.5 | 30.8 | 35.8 | 39.1 | 40.6 | 3.5  | 14.2 | 9.2  | 5.9  | 4.4  |
| 30.0                             | 31.7 | 17.2 | 24.1 | 26.8 | 29.4 | 1.7  | 12.8 | 5.9  | 3.2  | 0.6  |
| 37.0                             | 27.8 | 15.2 | 21.4 | 23.6 | 25.9 | 9.2  | 21.8 | 15.6 | 13.4 | 11.1 |
| 62.0                             | 59.5 |      |      |      |      | 2.5  |      |      |      |      |
| 58.0                             | 50.4 |      |      |      |      | 7.6  |      |      |      |      |
| 69.0                             | 74.4 |      |      |      |      | 5.4  |      |      |      |      |
| 67.0                             | 67.6 |      |      |      |      | 0.6  |      |      |      |      |
| 57.0                             | 48.9 |      |      |      |      | 8.1  |      |      |      |      |
| 55.0                             | 43.0 |      |      |      |      | 12.0 |      |      |      |      |
| 61.0                             | 55.5 |      |      |      |      | 5.5  |      |      |      |      |
| 59.0                             | 54.1 |      |      |      |      | 4.9  |      |      |      |      |
| 18.0                             | 18.2 |      |      |      |      | 0.2  |      |      |      |      |
| Average absolute deviation, wt.% |      |      |      |      |      | 3.3  | 7.5  | 3.4  | 2.8  | 2.1  |

Table S7 Comparison between measured and predicted by the empirical correlations saturates content in VGO from different origin

| Designation                     | Measured<br>VGO<br>saturates<br>content,<br>wt. % | Estimated<br>as 100-<br>eq.39<br>VGO sat.<br>content,<br>wt. % | Estimated<br>by eq.40<br>VGO sat.<br>content,<br>wt. % | Abs.<br>dev.<br>(eq.39) | Abs.<br>dev.<br>(eq.40) |
|---------------------------------|---------------------------------------------------|----------------------------------------------------------------|--------------------------------------------------------|-------------------------|-------------------------|
|                                 | 90.1                                              | 77.0                                                           | 88.0                                                   | 13.1                    | 2.1                     |
|                                 | 46.8                                              | 50.4                                                           | 46.4                                                   | 3.6                     | 0.4                     |
|                                 | 61                                                | 61.4                                                           | 65.9                                                   | 0.4                     | 4.9                     |
|                                 | 45.7                                              | 49.1                                                           | 45.5                                                   | 3.4                     | 0.2                     |
|                                 | 34.4                                              | 40.6                                                           | 36.6                                                   | 6.2                     | 2.2                     |
|                                 | 35.4                                              | 43.6                                                           | 39.1                                                   | 8.2                     | 3.7                     |
|                                 | 28.7                                              | 33.8                                                           | 29.9                                                   | 5.1                     | 1.2                     |
|                                 | 35.5                                              | 38.8                                                           | 35.5                                                   | 3.3                     | 0.0                     |
|                                 | 29.1                                              | 36.1                                                           | 32.4                                                   | 7.0                     | 3.3                     |
|                                 | 23                                                | 31.8                                                           | 27.8                                                   | 8.8                     | 4.8                     |
|                                 | 73.7                                              | 77.2                                                           | 82.1                                                   | 3.5                     | 8.4                     |
|                                 | 71.7                                              | 63.8                                                           | 62.7                                                   | 7.9                     | 9.0                     |
|                                 | 61.9                                              | 60.0                                                           | 57.5                                                   | 1.9                     | 4.4                     |
|                                 | 62.9                                              | 63.6                                                           | 61.6                                                   | 0.7                     | 1.3                     |
|                                 | 48.2                                              | 47.9                                                           | 45.0                                                   | 0.3                     | 3.2                     |
|                                 | 50                                                | 49.1                                                           | 46.3                                                   | 0.9                     | 3.7                     |
|                                 | 47.4                                              | 43.3                                                           | 40.6                                                   | 4.1                     | 6.8                     |
|                                 | 40.3                                              | 34.6                                                           | 31.5                                                   | 5.7                     | 8.8                     |
|                                 | 25.3                                              | 23.1                                                           | 20.5                                                   | 2.2                     | 4.8                     |
| DQ-VGO (Nr.40<br>from Table S1) | 83.0                                              | 107.9                                                          | 100.0                                                  | 24.9                    | 17.0                    |

|                                  |      |      |      |      |      |
|----------------------------------|------|------|------|------|------|
|                                  | 60.8 | 56.6 | 53.3 | 4.3  | 7.5  |
|                                  | 0.8  | 4.6  | 3.3  | 3.8  | 2.5  |
|                                  | 0.9  | 4.5  | 3.0  | 3.6  | 2.1  |
|                                  | 2.3  | 7.8  | 6.2  | 5.5  | 3.9  |
|                                  | 5.8  | 8.2  | 6.7  | 2.4  | 0.9  |
|                                  | 10.2 | 19.5 | 17.2 | 9.3  | 7.0  |
|                                  | 14.9 | 19.8 | 17.4 | 4.9  | 2.5  |
|                                  | 15.8 | 18.6 | 16.1 | 2.8  | 0.3  |
|                                  | 19.8 | 26.6 | 23.6 | 6.8  | 3.8  |
|                                  | 22.4 | 25.3 | 22.4 | 2.9  | 0.0  |
|                                  | 23.5 | 29.1 | 26.1 | 5.6  | 2.6  |
|                                  | 25.7 | 28.7 | 25.8 | 3.0  | 0.1  |
|                                  | 21.9 | 26.8 | 23.9 | 4.9  | 2.0  |
|                                  | 29.6 | 32.8 | 29.6 | 3.2  | 0.0  |
|                                  | 34.9 | 42.6 | 38.9 | 7.7  | 4.0  |
|                                  | 38.9 | 46.9 | 43.4 | 8.0  | 4.5  |
| FCC SLO (Nr.57<br>from Table S1) | 38.1 | 22.1 | 19.4 | 16.0 | 18.7 |
| Average absolute deviation       |      |      |      | 5.6  | 4.1  |



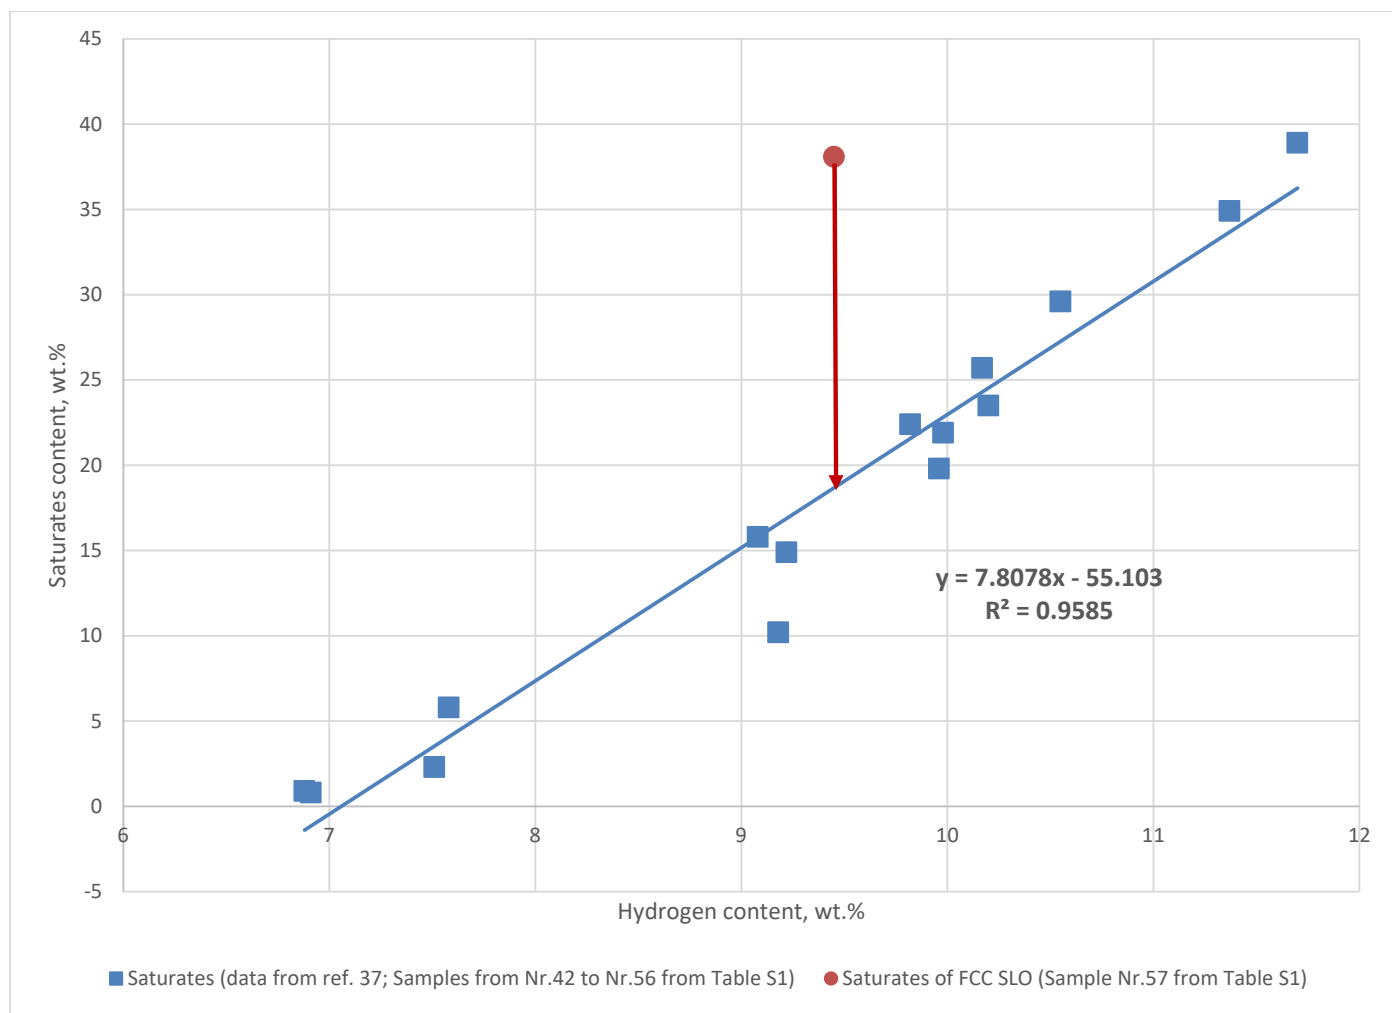

Figure S1 Relation of fluid catalytic cracking slurry oil hydrogen content to saturates content

## Reference

- Alabdullah, M.; Gomez, A.; Vittenet, J.; Bendjeriou-Sedjerari, A.; Xu, W.; Abba I.; Gascon, J. A Viewpoint on the Refinery of the Future: Catalyst and Process Challenges. *ACS Catal.* 2020, 10, 8131–8140. [\[CrossRef\]](#)
- Siauw, H., Ng.; Wang, J.; Fairbridge, C.; Zhu, Y.; Yang, J.L.; Ding, F.; Yui, S. Study of Canadian FCC Feeds from Various Origins and Treatments. 1. Ranking of Feedstocks Based on Feed Quality and Product Distribution. *Energy & Fuels* 2004, 18, 160-171. [\[CrossRef\]](#)
- Fisher, I.P. Effect of feedstock variability on catalytic cracking yields. *Applied Catalysis* 1990, 65, 189-210. [\[CrossRef\]](#)
- Billaud, F. Thermal cracking of vacuum distillates. *J Anal Appl Pyrolysis* 1986, 10, 139–51. [\[CrossRef\]](#)
- Bollas, G.M.; Vasalos, I.A.; Lappas, A.A.; Iatridis, D.K.; Tsioni, G.K. Bulk molecular characterization approach for the simulation of FCC feedstocks. *Ind. Eng. Chem. Res.* 2004, 43, 3270-3281. [\[CrossRef\]](#)
- Stratiev, D.; Galkin, V.; Shishkova, I.; Minkov, D.; Stanulov, K. Yield of products from catalytic cracking of vacuum gasoils. *Chem. Technol. Fuels Oils* 2007, 43, 311–318. [\[CrossRef\]](#)
- Stratiev, D.; Shishkova, I.; Ivanov, M.; Dinkov, R.; Georgiev, B.; Argirov, ; Atanassova, V.; Vassilev, P.; Atanassov, K.; Yordanov, D.; Popov, A.; Padovani, A.; Hartmann, U.; Nenov, S. Catalytic cracking of diverse vacuum residue hydrocracking gas oils. *Chem. Eng. Technol.* 2021, 44, No. 6, 997–1008. [\[CrossRef\]](#)
- Nazarova, G.; Oreshina, A.; Kaliyev, T.; Arkenova, S.; Antonov, A.; Lemeshko, E. Development of a formalized scheme of hydrocarbon transformations in the catalytic cracking for forecasting the individual composition of gases. *AIP Conference Proceedings* 2020, 2285, 020014. [\[CrossRef\]](#)
- Ivanchina, E. D.; Ivashkina, E. N.; Nazarova, G. Yu.; Seitenova, G. Zh. Influence of Feedstock Group Composition on the Octane Number and Composition of the Gasoline Fraction of Catalytically Cracked Vacuum Distillate. *Petroleum Chemistry*, 2018, 58, 3, 225–236. [\[CrossRef\]](#)
- Ivanchina, E.; Ivashkina, E.; Nazarova, G. Mathematical modelling of catalytic cracking riser reactor. *Chemical Engineering Journal* 2017, 329, 262–274. [\[CrossRef\]](#)
- Nazarova, G.; Ivashkina, E.; Ivanchina, E.; Oreshina, A.; Dolganova, I.; Pasyukova, M. Modeling of the catalytic cracking: Catalyst deactivation by coke and heavy metals. *Fuel Process. Technol.* 2020, 200. [\[CrossRef\]](#)
- Nazarova, G.; Ivashkina, E.; Ivanchina, E.; Oreshina, A.; Vymyatnin, E. A predictive model of catalytic cracking: Feedstock-induced changes in gasoline and gas composition. *Fuel Processing Technology* 2021, 217, 106720. [\[CrossRef\]](#)
- Nazarova, G. Y.; Ivashkina, E. N.; Oreshina, A. A.; Vymyatnin, E. K.; Seytenova, G. Z.; Burumbaeva, G. R. Vacuum distillate catalytic cracking technology modelling: Feedstock and products composition and properties investigation. *Petroleum and Coal* 2020, 62, 2, 380-389 10. [\[CrossRef\]](#)
- Nazarova, G. Y.; Ivashkina, E. N.; Ivanchina, E. D.; Vosmerikov, A. V.; Vosmerikova, L. N.; Antonov, A. V. A Model of Catalytic Cracking: Product Distribution and Catalyst Deactivation Depending on Saturates, Aromatics and Resins Content in Feed. *Catalysts* 2021, 11, 701. [\[CrossRef\]](#)
- Ng, S. H.; Heshka, N. E.; Zheng, Y.; Ling, H.; Wang, J.; Liu, Q.; Little, E.; Ding F.; Wang H. Virgin Heavy Gas Oil from Oil Sands Bitumen as FCC Feed. *Catalysts* 2020, 10, 277. [\[CrossRef\]](#)
- Stratiev, D.; Shishkova, I.; Veli, A.; Nikolova, R.; Stratiev, D.D.; Mitkova, M.; Yordanov, D. Fluid catalytic cracking and thermal cracking of vacuum gas oils. Effect of feedstock properties on conversion and yields. *OGE* 2017, 84-89. [\[CrossRef\]](#)
- Stratiev, D.; Minkov, D. Prediction of FCC yields from feedstock quality characterized by empirical methods. *Oil Gas European Magazine* 2000, 1:27-32. [\[CrossRef\]](#)
- ASTM D 3238-17a. Calculation of carbon distribution and structural group analysis of petroleum oils by the n-d-M method. 2017
- Riazi, M.R.; Daubert, T.E. Prediction of Molecular-Type Analysis of Petroleum Fractions and Coal Liquids. *Ind. Eng. Chem. Res.* 1986, 25, 1009-15. [\[CrossRef\]](#)
- Riazi, M.R.; Daubert, T.E. Characterization Parameters for Petroleum Fractions. *Ind. Eng. Chem. Res.* 1987, 26, 755-9. [\[CrossRef\]](#)
- Choudhary, T.V.; Meier, P.F. Characterization of heavy petroleum feedstocks. *Fuel Processing Technology* 2008, 89, 697-703. [\[CrossRef\]](#)
- Goossens, A. Prediction of the Hydrogen Content of Petroleum Fractions. *Ind. Eng. Chem. Res.* 1997, 36, 2500-4. [\[CrossRef\]](#)
- Goossens, A.G. Prediction of Molecular Weight of Petroleum Fractions. *Ind. Eng. Chem. Res.* 1996, 35, 985-8. [\[CrossRef\]](#)
- Riazi, M.R. Characterization and Properties of Petroleum Fraction. *ASTM manual series MNL50*. 2005, Philadelphia. [\[CrossRef\]](#)
- Dhulesia, H. New Correlations Predict Fcc Feed Characterizing Parameters. *Oil & Gas J.* 1986, 84, 51–4. [\[CrossRef\]](#)
- Abutaqiya, M. Advances in Thermodynamic Modeling of Nonpolar Hydrocarbons and Asphaltene Precipitation in Crude Oils. *PhD Thesis, Rice University, (Houston)* 2019. [\[CrossRef\]](#)
- Abutaqiya, M.I. L.; AlHammadi, A. A.; Sisco, C. J.; Vargas, F. M. Aromatic Ring Index (ARI): A Characterization Factor for Nonpolar Hydrocarbons from Molecular Weight and Refractive Index. *Energy Fuels* 2021, 35, 1113–1119. [\[CrossRef\]](#)
- Modarress, H.; Vakili-Nezhaad, G. R. A. New Characterization Factor for Hydrocarbons and Petroleum Fluids Fractions. *Oil Gas Sci. Technol.* 2002, 57, 149–154. [\[CrossRef\]](#)
- Pujro, R.; Falco, M.; Sedran, U., Catalytic cracking of heavy aromatics and polycyclic aromatic hydrocarbons (PAHs) over FCC catalysts. *Energy Fuels* 2015, 29, 3, 1543–1549, [CrossRef](#).
- Abbott, M.M.; Kaufmann, T.G.; Domash, L. A. Correlation for Predicting Liquid Viscosities of Petroleum Fractions. *Canadian Journal of Chemical Engineering* 1971, 49, 379-384. [\[CrossRef\]](#)
- Stratiev, D.S.; Marinov, I.M.; Shishkova, I.K.; Dinkov, R.K.; Stratiev, D.D. Investigation on feasibility to predict the content of saturate plus mono-nuclear aromatic hydrocarbons in vacuum gas oils from bulk properties and empirical correlations. *Fuel* 2014, 129, 156–62. [\[CrossRef\]](#)

32. Stratiev, D.; Shishkova, I.; Tankov, I.; Pavlova, A. Challenges in characterization of residual oils. A review. *J Pet Sci Eng* 2019, 178, 227–50. [\[CrossRef\]](#)
33. Marques, J.; Maget, S.; Verstraete, J. Improvement of ebullated-bed effluent stability at high conversion operation. *Energy Fuels* 2011, 25, 3867–74. [\[CrossRef\]](#)
34. Ding, F.; Ng, S.H.; Xu, C.; Yui, S. Reduction of light cycle oil in catalytic cracking of bitumen-derived crude HGOs through catalyst selection. *Fuel Process Technol* 2007, 88, 833–45. [\[CrossRef\]](#)
35. Prabha, K.; Dasila, I.R.; Choudhury, D.N.; Saraf, V.; Kagdiyal, S.; Rajagopal, S.J.; Chopra. Estimation of FCC feed composition from routinely measured lab properties through ANN model. *Fuel Processing Technology* 2014, 125, 155–162. [\[CrossRef\]](#)
36. Sheppard, C. M.; Green, J. B.; Vanderveen, J. W. Relating Feedstock Composition to Product Slate and Composition in Catalytic Cracking. An Extended Pendant-Core Model for Gasoline Composition. *Energy & Fuels* 1998, 12, 320–328. [\[CrossRef\]](#)
37. Li, Z.; Wang, G.; Shi, Q.; Xu, C.; Gao, J. Retardation Effect of Basic Nitrogen Compounds on Hydrocarbons Catalytic Cracking in Coker Gas Oil and their Structural Identification. *Ind. Eng. Chem. Res.* 2011, 50, 4123–4132. [\[CrossRef\]](#)
38. Mondal, S.; Yadav, A.; Kumar, R.; Bansal, V.; Das, S. K.; Christopher, J.; Kapur, G. S. Molecular-level structural insight into clarified oil by nuclear magnetic resonance (NMR) spectroscopy: Estimation of hydrocarbon types and average structural parameters. *Energy Fuels* 2017, 31, 7, 7682–7692. [\[CrossRef\]](#)
39. Li, W.; Chen, Y.; Zhang, L.; Xu, Z.; Sun, X.; Zhao, S.; Xu, C. Supercritical Fluid Extraction of FCC Slurry Oil: Bulk Property and Molecular Composition of Narrow Fraction. *Energy Fuels* 2016. [\[CrossRef\]](#)
40. Nesumi, Y.; Oyama, T.; Todo, Y.; Azuma, A. Properties of fluid catalytic cracking decant oils of different origins in their single carbonization and cocarbonization with a petroleum vacuum residue. *Ind. Eng. Chem. Res.* 1990, 29, 1793–1801. [\[CrossRef\]](#)
41. VanNes, K.; VanWesten, H. A. *Aspects of the Constitution of Mineral Oils*; Elsevier: New York, 1951.
42. Riazi, M. R. Ph.D. Thesis, Department of Chemical Engineering, The Pennsylvania State University, University Park, 1979.
43. Altgeld, K. H.; Boduszynski, M. *Composition and Analysis of Heavy Petroleum Fractions*. 1994, Marcel Dekker, Inc. 270 Madison Avenue, New York, New York 10016
44. Stratiev, D.; Nenov, S.; Shishkova, I.; Georgiev, B.; Argirov, G.; Dinkov, R.; Yordanov, D.; Atanassova, V.; Vassilev, P.; Atanassov, K. Commercial Investigation of the Ebullated-Bed Vacuum Residue Hydrocracking in the Conversion Range of 55–93%. *ACS Omega*, 2020, 5(1), (5), 33290. [\[CrossRef\]](#)
45. Todorova-Yankova, L.; Yordanov, D.; Stratiev, D.; Shishkova, I. Investigation on SARA composition of light, medium, heavy, and extra heavy crude oils, and oil sands, and bitumen. *Industrial Technologies* 2021, article in press (in Bulgarian).
46. Stratiev, D. S.; Shishkova, I. K.; Dinkov, R. K.; Petrov, I. P.; Kolev, I. V.; Yordanov, D.; Sotirov, S.; Sotirova, E.; Atanassova, V.; Ribagin, S.; Atanassov, K.; Stratiev, D. D.; Nenov, S. Crude Slate, FCC slurry oil, Recycle, and Operating Conditions Effects on H-Oil product quality. *Processes* 2021, 9, 952. [\[CrossRef\]](#)
47. Jacob, S. M.; Gross, B.; Voltz, S. E.; Weekman, V. W. Lumping and reaction scheme for catalytic cracking. *AIChE J.* 1976, 22 (4), 701. [CrossRef](#).
48. Ancheyta-Juarez, J.; Lopez-Isunza, F.; Aguilar-Rodriguez, E.; Moreno-Mayorga, J. C. A Strategy for kinetic parameter estimation in the fluid catalytic cracking process. *Ind. Eng. Chem. Res.* 1997, 36, 5170–5174. [CrossRef](#).
49. Bollas, G. M.; Vasalos, I. Lappas, A. A.; Iatridis, D. K.; Tsioni, G. K. Bulk molecular characterization approach for the simulation of FCC feedstocks. *Ind. Eng. Chem. Res.* 2004, 43, 3270–3281. [CrossRef](#).
50. [https://en.wikipedia.org/wiki/Higher\\_alkanes](https://en.wikipedia.org/wiki/Higher_alkanes)
51. Mitkova, M.; Stratiev, D.; Shishkova, I.; Dobrev, D. Thermal and Thermo-Catalytic Processes for Heavy Oil Conversion. *Professor Marin Drinov Publishing House of Bulgarian Academy of Sciences* 2017, Sofia, Bulgaria. [\[CrossRef\]](#)
52. Das, S.; Suganthan, P. N. Differential Evolution: A Survey of the State of the Art. *IEEE Trans. Evol. Comput.* 2011, 15, 4–31. [\[CrossRef\]](#)
53. ASTM D 2007-19 Standard Test Method for Characteristic Groups in Rubber Extender and Processing Oils and Other Petroleum-Derived Oils by the Clay-Gel Absorption Chromatographic Method.
54. Stratiev, D.; Shishkova, I.; Ivanov, M.; Dinkov, R.; Georgiev, B.; Argirov, G.; Atanassova, V.; Vassilev, P.; Atanassov, K.; Yordanov, D.; Popov, A.; Padovani, A.; Hartmann, U.; Brandt, S.; Nenov, S.; Sotirov, S.; Sotirova, E.; Role of catalyst in optimizing fluid catalytic cracking performance during cracking of h-oil-derived gas oils. *ACS Omega* 2021, 6, 11, 7626–7637. [\[CrossRef\]](#)
55. Stratiev, D.; Shishkova, I.; Nikolova, R.; Tsaneva, T.; Mitkova, M.; Yordanov, D. Investigation on precision of determination of SARA analysis of vacuum residual oils from different origin. *Pet Coal* 2016, 58, 109–119. [\[CrossRef\]](#)
56. Stratiev, D.; Shishkova, I.; Tsaneva, T.; Mitkova, M.; Yordanov, D. Investigation of relations between properties of vacuum residual oils from different origin, and of their deasphalted and asphaltene fractions. *Fuel* 2016; 170: 115–29. [\[CrossRef\]](#)
57. Liñan, L. Z.; Lima, N.M.N.; Maciel, M. R. W.; Filho, R. M.; Medina, L.C.; Embiruçu, M. Correlation for predicting the molecular weight of Brazilian petroleum residues and cuts: An application for the simulation of a molecular distillation process. *J. Pet. Sci. Eng.* 2011, 78, 78–85. [\[CrossRef\]](#)
58. Sánchez-Lemus, M. C.; Schoegl, F.; Taylor, S. D.; Yarranton, H. W. Physical properties of heavy oil distillation cuts. *Fuel*, 2016, 180, 457–452. [CrossRef](#)
59. Stratiev, D.; Minkov, D. Prediction of FCC yields from feedstock quality characterized by empirical methods. *Oil Gas Eur. Mag.*, 2000, 1, 27–32
